# Supplementary material for: Longitudinal and Multimodal Radiomics Models for Head and Neck Cancer Outcome Prediction
Source: MDPI journal article supplement (doi:10.3390/cancers15030673), 2023-01-21
Supplement: s1 [file s1]

Supplement to: Longitudinal and multimodal  
radiomics models for head-and-neck cancer  
outcome prediction

**Contents**

|          |                                                                                               |           |
|----------|-----------------------------------------------------------------------------------------------|-----------|
| <b>1</b> | <b>Image acquisition parameters</b>                                                           | <b>2</b>  |
| <b>2</b> | <b>Performance of final signature models based on univariate regression feature selection</b> | <b>4</b>  |
| <b>3</b> | <b>Stratification</b>                                                                         | <b>5</b>  |
| <b>4</b> | <b>Final feature signatures</b>                                                               | <b>7</b>  |
| <b>5</b> | <b>Visualization of feature membership in final signatures</b>                                | <b>9</b>  |
| <b>6</b> | <b>Delta-radiomics: Performance</b>                                                           | <b>13</b> |
| <b>7</b> | <b>Delta-radiomics: Signatures</b>                                                            | <b>15</b> |
| <b>8</b> | <b>Feature differences between cohorts</b>                                                    | <b>17</b> |
| <b>9</b> | <b>Prediction differences between cohorts</b>                                                 | <b>19</b> |

# 1 Image acquisition parameters

Table S1: **Image acquisition parameters (CT):**

| Variable              | Exploration |    |    | Ind. validation |    |    |
|-----------------------|-------------|----|----|-----------------|----|----|
|                       | W0          | W2 | W3 | W0              | W2 | W3 |
| Spacing z (mm)        |             |    |    |                 |    |    |
| 2                     | 0           | 1  | 0  | 0               | 0  | 0  |
| 3                     | 9           | 0  | 6  | 0               | 0  | 0  |
| 5                     | 28          | 36 | 31 | 18              | 18 | 18 |
| Spacing x,y (mm)      |             |    |    |                 |    |    |
| 0.98                  | 9           | 0  | 6  | 0               | 0  | 0  |
| 1.37                  | 28          | 37 | 31 | 18              | 18 | 18 |
| Tube voltage (kV)     |             |    |    |                 |    |    |
| 120                   | 35          | 37 | 37 | 18              | 18 | 18 |
| unknown               | 2           | 0  | 0  | 0               | 0  | 0  |
| Reconstruction kernel |             |    |    |                 |    |    |
| B10s                  | 1           | 0  | 0  | 0               | 0  | 0  |
| B19f                  | 0           | 9  | 1  | 0               | 0  | 0  |
| B20f                  | 25          | 28 | 30 | 16              | 18 | 18 |
| B20s                  | 0           | 0  | 0  | 2               | 0  | 0  |
| B31f                  | 9           | 0  | 6  | 0               | 0  | 0  |
| unknown               | 2           | 0  | 0  | 0               | 0  | 0  |
| Exposure time (ms)    |             |    |    |                 |    |    |
| 420                   | 0           | 28 | 15 | 0               | 18 | 18 |
| 500                   | 34          | 9  | 22 | 16              | 0  | 0  |
| 750                   | 1           | 0  | 0  | 2               | 0  | 0  |
| unknown               | 2           | 0  | 0  | 0               | 0  | 0  |

Abbreviations: Ind., Independent

Table S2: **Image acquisition parameters (FDG-PET):**

| Variable                   | Exploration         |                     | Ind. validation     |                     |
|----------------------------|---------------------|---------------------|---------------------|---------------------|
|                            | W0                  | W3                  | W0                  | W3                  |
| Spacing z (mm)             |                     |                     |                     |                     |
| 3                          | 0                   | 3                   | 0                   | 0                   |
| 5                          | 37                  | 34                  | 18                  | 18                  |
| Spacing x,y (mm)           |                     |                     |                     |                     |
| 0.98                       | 0                   | 3                   | 0                   | 0                   |
| 1.37                       | 37                  | 6                   | 0                   | 0                   |
| 4.06                       | 0                   | 28                  | 18                  | 18                  |
| Kernel                     |                     |                     |                     |                     |
| Gaussian FWHM=5            | 37                  | 37                  | 18                  | 18                  |
| Reconstruction method      |                     |                     |                     |                     |
| OSEM2D 6i4s                | 37                  | 37                  | 18                  | 18                  |
| Median uptake time (range) | 84.1 (60.9 - 177.8) | 82.6 (59.3 - 121.8) | 86.4 (64.9 - 119.0) | 74.1 (53.5 - 157.7) |

Abbreviations: Ind., Independent

## 2 Performance of final signature models based on univariate regression feature selection

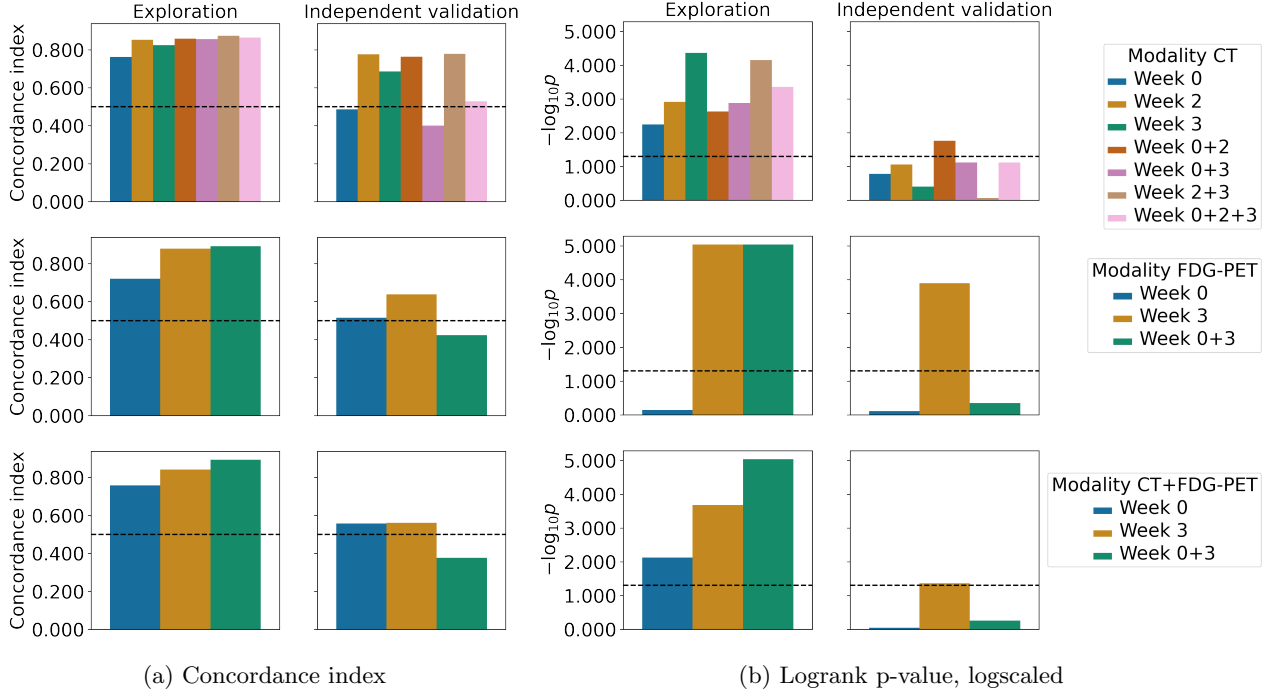

Figure S1: Performance of the final signature models. The final signature was determined from the univariate regression feature importance scores of all bootstraps from the cross-validation. Values above the dashed line indicate non-random predictions and statistically significant stratifications, respectively.

### 3 Stratification

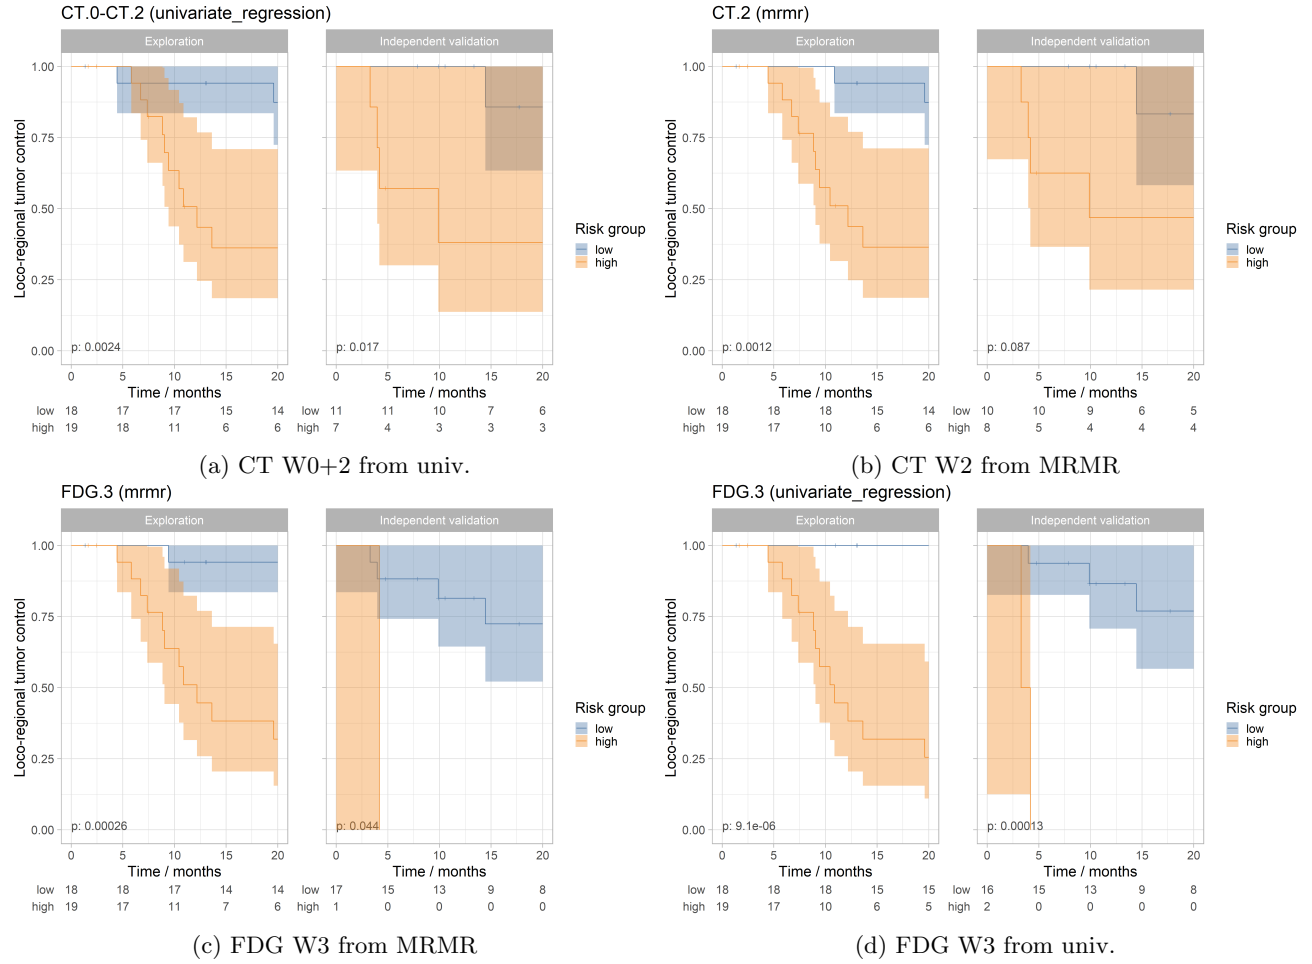

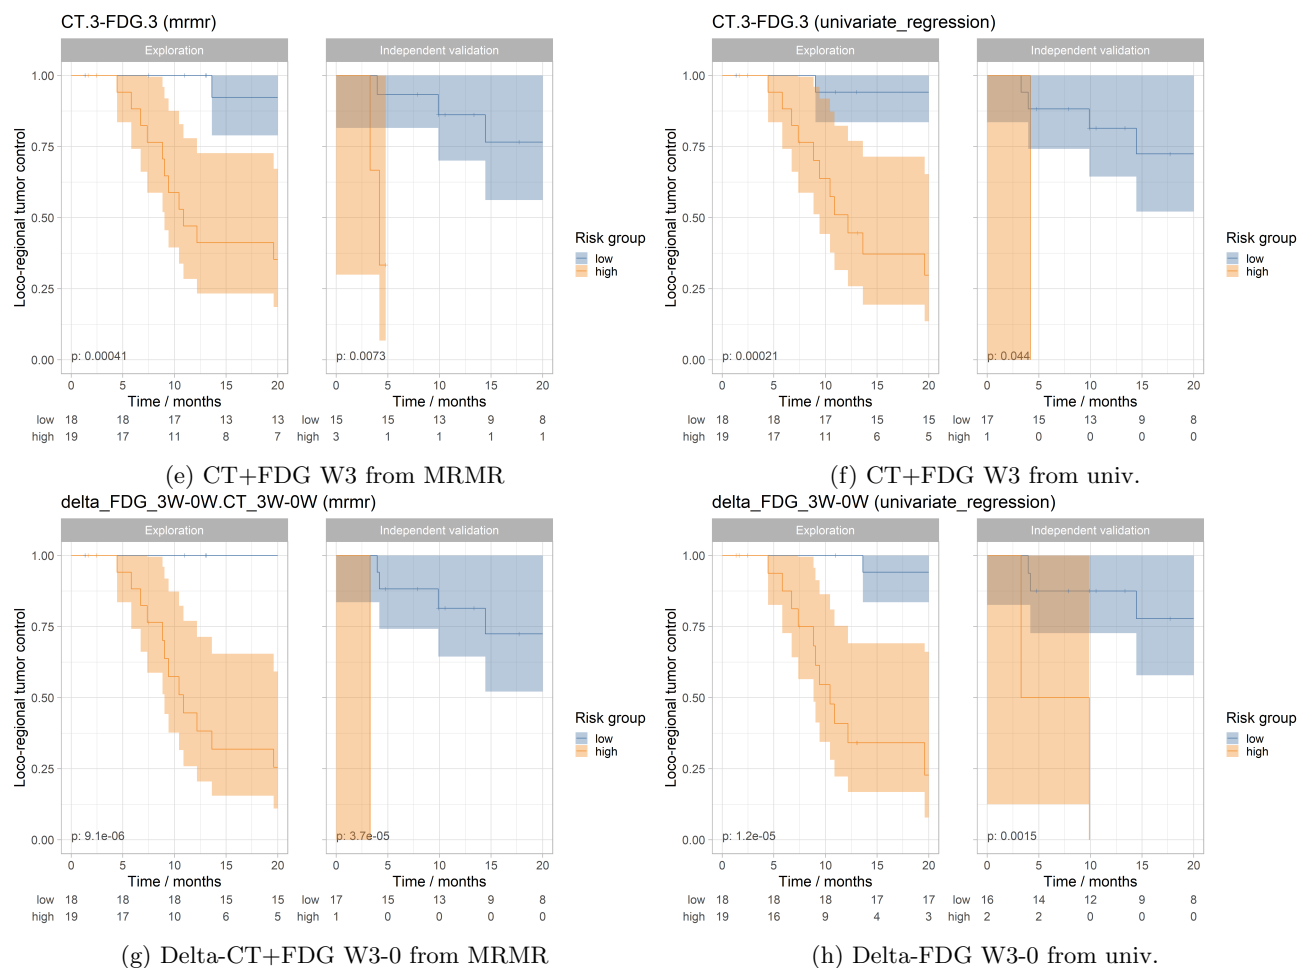

Figure S2: Stratifications created by some final signature models. The cutoff was determined as the median prediction on the exploratory cohort.

## 4 Final feature signatures

Table S3: **Final signature features (CT)**: Values in parenthesis denote occurrence among the top five features in percent

| Experiment | Feature selection | Feature 1                                                                                        | Feature 2                                                                                        | Feature 3                                                                            | Feature 4                                                                                        |
|------------|-------------------|--------------------------------------------------------------------------------------------------|--------------------------------------------------------------------------------------------------|--------------------------------------------------------------------------------------|--------------------------------------------------------------------------------------------------|
| Week 0     | MRMR univariate   | CT_0W_morph_pca_elongation (29)<br>CT_0W_szm_zs_entr_3d_fbs_w12_0 (33)                           | CT_0W_ih_mode_fbs_w12_0 (26)<br>CT_0W_szm_lzlge_3d_fbs_w12_0 (31)                                | CT_0W_rlm_srhge_3d_v_mrg_fbs_w12_0 (21)<br>CT_0W_ngl_ldhge_d1_a0_0_3d_fbs_w12_0 (23) | CT_0W_dzm_zd_var_3d_fbs_w12_0 (19)<br>CT_0W_rlm_srhge_3d_v_mrg_fbs_w12_0 (23)                    |
| Week 2     | MRMR univariate   | CT_2W_cm_info_corr2_d1_3d_v_mrg_fbs_w12_0 (48)<br>CT_2W_cm_info_corr2_d1_3d_v_mrg_fbs_w12_0 (55) | CT_2W_stat_kurt (47)<br>CT_2W_stat_kurt (55)                                                     | CT_2W_morph_vol_dens_aee (38)<br>CT_2W_dzm_sde_3d_fbs_w12_0 (33)                     | CT_2W_dzm_sde_3d_fbs_w12_0 (32)<br>CT_2W_morph_vol_dens_aee (32)                                 |
| Week 3     | MRMR univariate   | CT_3W_morph_area_dens_aee (32)<br>CT_3W_szm_zs_entr_3d_fbs_w12_0 (37)                            | CT_3W_morph_vol_dens_aee (31)<br>CT_3W_morph_vol_dens_aee (35)                                   | CT_3W_morph_pca_flatness (30)<br>CT_3W_morph_area_dens_aee (31)                      | CT_3W_szm_zs_entr_3d_fbs_w12_0 (25)<br>CT_3W_dzm_lde_3d_fbs_w12_0 (28)                           |
| Week 0+2   | MRMR univariate   | CT_2W_stat_kurt (48)<br>CT_2W_stat_kurt (53)                                                     | CT_2W_cm_info_corr2_d1_3d_v_mrg_fbs_w12_0 (23)<br>CT_2W_cm_info_corr2_d1_3d_v_mrg_fbs_w12_0 (29) | CT_0W_morph_pca_elongation (23)<br>CT_2W_dzm_lde_3d_fbs_w12_0 (20)                   | CT_2W_morph_vol_dens_aee (22)<br>CT_2W_morph_vol_dens_aee (19)                                   |
| Week 0+3   | MRMR univariate   | CT_3W_morph_vol_dens_aee (36)<br>CT_3W_morph_vol_dens_aee (30)                                   | CT_0W_morph_pca_elongation (28)<br>CT_0W_ngl_ldhge_d1_a0_0_3d_fbs_w12_0 (24)                     | CT_0W_rlm_srhge_3d_v_mrg_fbs_w12_0 (21)<br>CT_0W_rlm_srhge_3d_v_mrg_fbs_w12_0 (22)   | CT_3W_morph_pca_flatness (17)<br>CT_3W_dzm_sde_3d_fbs_w12_0 (20)                                 |
| Week 2+3   | MRMR univariate   | CT_2W_stat_kurt (51)<br>CT_2W_stat_kurt (51)                                                     | CT_3W_morph_vol_dens_aee (27)<br>CT_3W_morph_vol_dens_aee (29)                                   | CT_2W_dzm_lde_3d_fbs_w12_0 (20)<br>CT_2W_dzm_lde_3d_fbs_w12_0 (26)                   | CT_2W_cm_info_corr2_d1_3d_v_mrg_fbs_w12_0 (20)<br>CT_2W_cm_info_corr2_d1_3d_v_mrg_fbs_w12_0 (22) |
| Week 0+2+3 | MRMR univariate   | CT_2W_stat_kurt (27)<br>CT_2W_stat_kurt (29)                                                     | CT_0W_rlm_srhge_3d_v_mrg_fbs_w12_0 (26)<br>CT_3W_morph_vol_dens_aee (24)                         | CT_3W_morph_vol_dens_aee (24)<br>CT_0W_rlm_srhge_3d_v_mrg_fbs_w12_0 (21)             | CT_2W_cm_info_corr2_d1_3d_v_mrg_fbs_w12_0 (18)<br>CT_2W_dzm_lde_3d_fbs_w12_0 (20)                |

Table S4: **Final signature features (FDG-PET)**: Values in parenthesis denote occurrence among the top five features in percent

| Experiment | Feature selection | Feature 1                                                                 | Feature 2                                                                   | Feature 3                                                                  | Feature 4                                                                            |
|------------|-------------------|---------------------------------------------------------------------------|-----------------------------------------------------------------------------|----------------------------------------------------------------------------|--------------------------------------------------------------------------------------|
| Week 0     | MRMR univariate   | FDG_0W_morph_pca_elongation (38)<br>FDG_0W_ngt_strength_3d_fbs_w0_25 (34) | FDG_0W_morph_vol_dens_aee (30)<br>FDG_0W_morph_pca_flatness (30)            | FDG_0W_morph_pca_flatness (29)<br>FDG_0W_morph_pca_elongation (24)         | FDG_0W_stat_min (25)<br>FDG_0W_morph_pca_min_axis (24)                               |
| Week 3     | MRMR univariate   | FDG_3W_dzm_sde_3d_fbs_w0_25 (59)<br>FDG_3W_dzm_sde_3d_fbs_w0_25 (78)      | FDG_3W_morph_vol_dens_aee (38)<br>FDG_3W_ngl_dcnu_d1_a0_0_3d_fbs_w0_25 (31) | FDG_3W_ngt_strength_3d_fbs_w0_25 (30)<br>FDG_3W_szm_zsnu_3d_fbs_w0_25 (25) | FDG_3W_morph_pca_flatness (25)<br>FDG_3W_ih_entropy_fbs_w0_25 (25)                   |
| Week 0+3   | MRMR univariate   | FDG_3W_dzm_sde_3d_fbs_w0_25 (51)<br>FDG_3W_dzm_sde_3d_fbs_w0_25 (60)      | FDG_0W_stat_min (38)<br>FDG_3W_szm_zsnu_3d_fbs_w0_25 (35)                   | FDG_3W_ngt_strength_3d_fbs_w0_25 (20)<br>FDG_3W_stat_energy (34)           | FDG_0W_morph_pca_elongation (18)<br>FDG_3W_cm_clust_shade_d1_3d_v_mrg_fbs_w0_25 (18) |

∞

Table S5: **Final signature features (CT+FDG-PET):** Values in parenthesis denote occurrence among the top five features in percent

| Experiment | Feature selection | Feature 1                           | Feature 2                         | Feature 3                                 | Feature 4                                         |
|------------|-------------------|-------------------------------------|-----------------------------------|-------------------------------------------|---------------------------------------------------|
| Week 0     | MRMR              | FDG_0W_morph_pca_elongation (33)    | FDG_0W_stat_min (22)              | FDG_0W_ih_min_fbs_w0_25 (18)              | CT_0W_ih_mode_fbs_w12_0 (14)                      |
|            |                   | CT_0W_szm_zs_entr_3d_fbs_w12_0 (26) | CT_0W_szm_lzlge_3d_fbs_w12_0 (23) | FDG_0W_morph_pca_elongation (22)          | CT_0W_cm_inv_diff_norm_d1_3d_v_mrg_fbs_w12_0 (18) |
|            | univariate        | FDG_3W_dzm_sde_3d_fbs_w0_25 (55)    | CT_3W_morph_vol_dens_aee (23)     | CT_3W_morph_area_dens_conv_hull (14)      | CT_3W_morph_pca_flatness (14)                     |
| Week 3     | MRMR              | FDG_3W_dzm_sde_3d_fbs_w0_25 (68)    | FDG_3W_szm_zsnu_3d_fbs_w0_25 (31) | FDG_3W_ngl_dcnu_d1_a0_0_3d_fbs_w0_25 (25) | FDG_3W_stat_energy (23)                           |
|            |                   | FDG_3W_dzm_sde_3d_fbs_w0_25 (41)    | FDG_0W_morph_pca_elongation (18)  | FDG_0W_stat_min (17)                      | FDG_3W_szm_zsnu_3d_fbs_w0_25 (15)                 |
| Week 0+3   | MRMR              | FDG_3W_dzm_sde_3d_fbs_w0_25 (44)    | FDG_3W_szm_zsnu_3d_fbs_w0_25 (34) | FDG_3W_ih_entropy_fbs_w0_25 (22)          | FDG_3W_cm_clust_shade_d1_3d_v_mrg_fbs_w0_25 (15)  |
|            |                   |                                     |                                   |                                           |                                                   |



## 5 Visualization of feature membership in final signatures

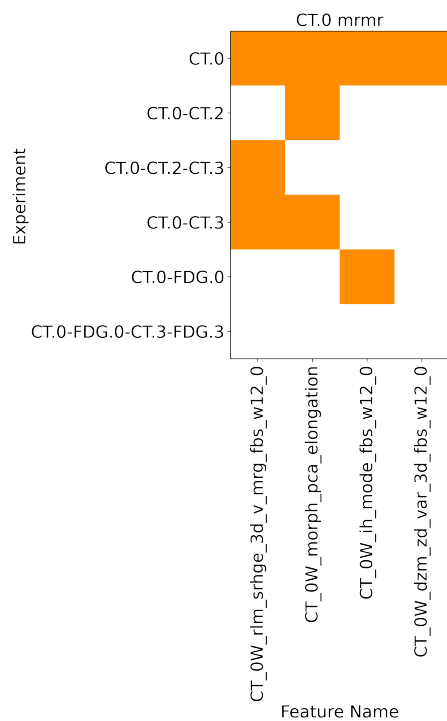

(a) CT0 features

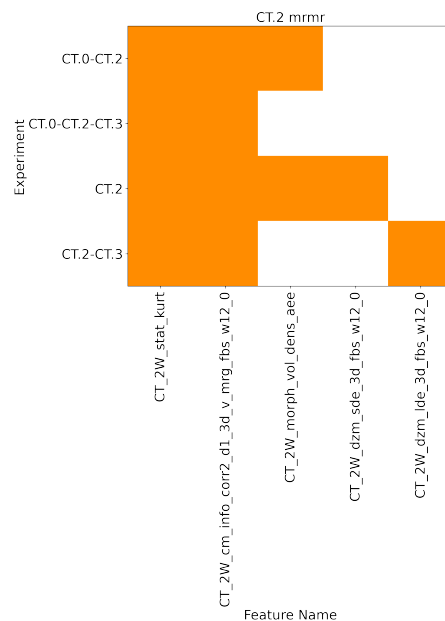

(b) CT2 features

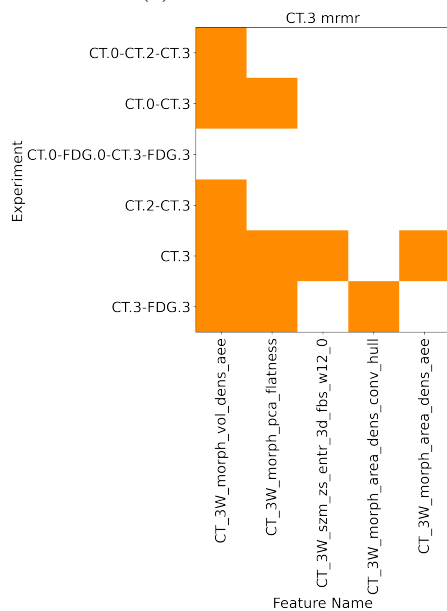

(c) CT3 features

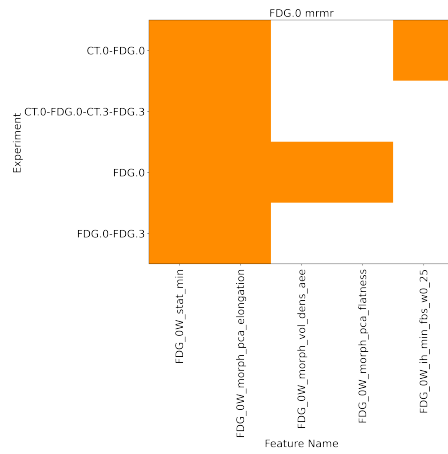

(d) FDG0 features

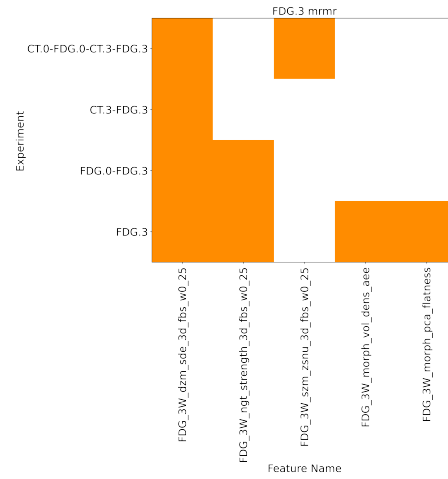

(e) FDG3 features

Figure S3: Selected features by MRMR shown by modality and timepoint. For each modality and timepoint, membership of a feature in an experiment's final signature is denoted in orange.

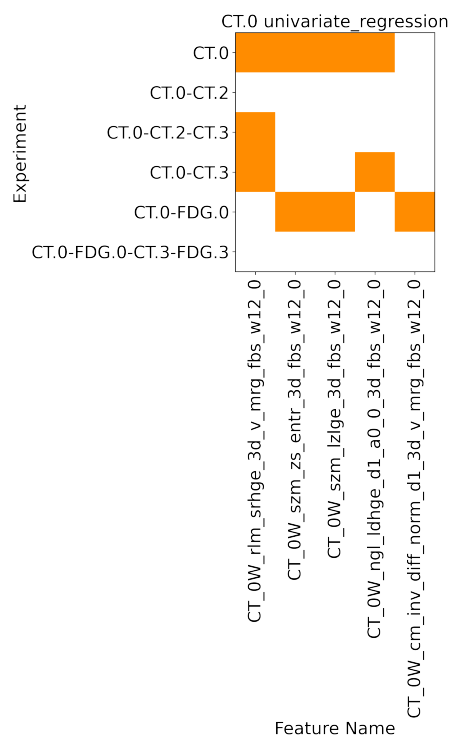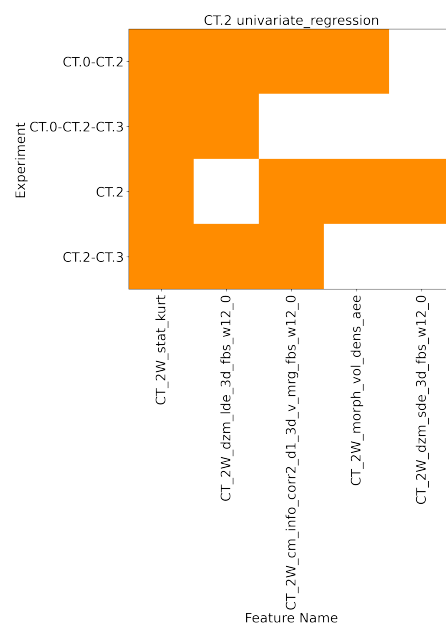

(a) CT0 features

(b) CT2 features

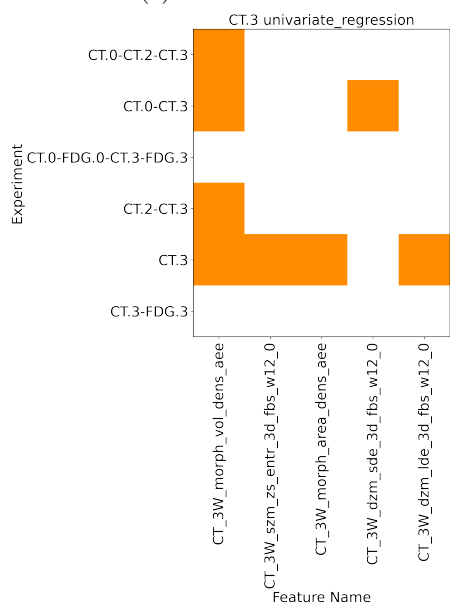

(c) CT3 features

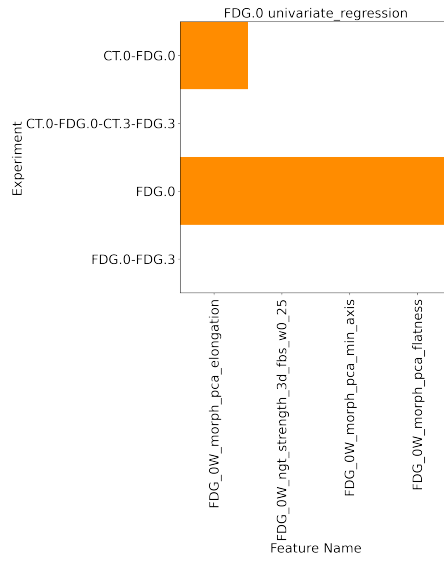

(d) FDG0 features

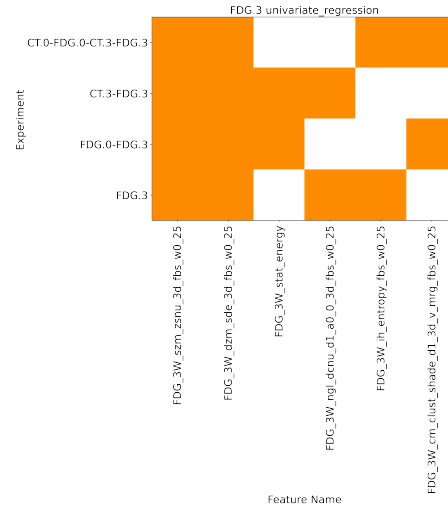

(e) FDG3 features

Figure S4: Selected features by univariate regression shown by modality and timepoint. For each modality and timepoint, membership of a feature in an experiment's final signature is denoted in orange.

## 6 Delta-radiomics: Performance

Table S6: **Final signature model performance (CT)**: Values in parenthesis denote 95% confidence intervals based on bootstrapping. Values in bold denote best validation performance. The last column provides the fraction of patients assigned to the low-risk group based on the prediction cutoff. The number of patients in the low-risk group of the exploratory cohort are always 18 out of 37 because the median prediction was used as cutoff.

| Experiment         | Feature selection | C-index            |                           | Log-rank $p$ -value |                            | Patients in low risk group<br>Ind. validation |
|--------------------|-------------------|--------------------|---------------------------|---------------------|----------------------------|-----------------------------------------------|
|                    |                   | Exploration        | Ind. validation           | Exploration         | Ind. validation            |                                               |
| Week 2-0           | MRMR              | 0.79 (0.66 - 0.91) | <b>0.80 (0.37 - 0.97)</b> | 0.003               | 0.94                       | 7/18                                          |
|                    | univariate        | 0.76 (0.61 - 0.89) | 0.69 (0.30 - 0.91)        | 0.010               | 0.86                       | 8/18                                          |
| Week 3-0           | MRMR              | 0.76 (0.55 - 0.93) | 0.42 (0.07 - 0.87)        | 0.002               | 0.14                       | 7/18                                          |
|                    | univariate        | 0.76 (0.55 - 0.93) | 0.42 (0.07 - 0.87)        | 0.002               | 0.14                       | 7/18                                          |
| Week 3-2           | MRMR              | 0.74 (0.56 - 0.89) | 0.64 (0.37 - 0.88)        | 0.051               | NA (all in low-risk group) | 18/18                                         |
|                    | univariate        | 0.74 (0.53 - 0.89) | 0.58 (0.25 - 0.86)        | 0.22                | 0.32                       | 13/18                                         |
| Week 2-0, 3-0      | MRMR              | 0.82 (0.65 - 0.95) | 0.41 (0.13 - 0.71)        | 0.005               | 0.94                       | 5/18                                          |
|                    | univariate        | 0.81 (0.64 - 0.96) | 0.54 (0.14 - 0.87)        | 0.005               | 0.76                       | 5/18                                          |
| Week 2-0, 3-2      | MRMR              | 0.79 (0.64 - 0.92) | <b>0.80 (0.49 - 0.97)</b> | 0.054               | 0.64                       | 6/18                                          |
|                    | univariate        | 0.78 (0.62 - 0.92) | 0.71 (0.37 - 0.96)        | 0.046               | 0.58                       | 8/18                                          |
| Week 3-0, 3-2      | MRMR              | 0.83 (0.68 - 0.96) | 0.58 (0.20 - 0.92)        | 0.003               | 0.27                       | 2/18                                          |
|                    | univariate        | 0.83 (0.68 - 0.96) | 0.58 (0.20 - 0.92)        | 0.003               | 0.27                       | 2/18                                          |
| Week 2-0, 3-0, 3-2 | MRMR              | 0.80 (0.63 - 0.94) | 0.52 (0.14 - 0.85)        | 0.011               | 0.76                       | 5/18                                          |
|                    | univariate        | 0.81 (0.63 - 0.96) | 0.47 (0.12 - 0.83)        | 0.005               | 0.49                       | 6/18                                          |

Abbreviations: C-index, concordance index; MRMR, minimum redundancy - maximum relevance; univariate, univariate Cox regression; Ind., Independent; NA, not available

Table S7: **Final signature model performance (FDG-PET)**: Values in parenthesis denote 95% confidence intervals based on bootstrapping. Values in bold denote best validation performance. The last column provides the fraction of patients assigned to the low-risk group based on the prediction cutoff. The number of patients in the low-risk group of the exploratory cohort are always 18 out of 37 because the median prediction was used as cutoff. \* indicates statistically significant  $p$ -values for the stratification that produced highly imbalanced groups of low and high-risk of loco-regional recurrence.

| Experiment | Feature selection | C-index            |                          | Log-rank $p$ -value |                            | Patients in low risk group<br>Ind. validation |
|------------|-------------------|--------------------|--------------------------|---------------------|----------------------------|-----------------------------------------------|
|            |                   | Exploration        | Ind. validation          | Exploration         | Ind. validation            |                                               |
| Week 3-0   | MRMR              | 0.91 (0.78 - 0.97) | 0.54 (0.09 - 0.93)       | < 0.001             | NA (all in low-risk group) | 18/18                                         |
|            | univariate        | 0.90 (0.80 - 0.96) | <b>0.73 (0.35 - 1.0)</b> | < 0.001             | <b>0.002*</b>              | 16/18                                         |

Abbreviations: C-index, concordance index; MRMR, minimum redundancy - maximum relevance; univariate, univariate Cox regression; Ind., Independent; NA, not available

Table S8: **Final signature model performance (CT+FDG-PET):** Values in parenthesis denote 95% confidence intervals based on bootstrapping. Values in bold denote best validation performance. The last column provides the fraction of patients assigned to the low-risk group based on the prediction cutoff. The number of patients in the low-risk group of the exploratory cohort are always 18 out of 37 because the median prediction was used as cutoff. \* indicates statistically significant  $p$ -values for the stratification that produced highly imbalanced groups of low and high-risk of loco-regional recurrence.

| Experiment | Feature selection | C-index            |                           | Log-rank $p$ -value |                 | Patients in low risk group |
|------------|-------------------|--------------------|---------------------------|---------------------|-----------------|----------------------------|
|            |                   | Exploration        | Ind. validation           | Exploration         | Ind. validation | Ind. validation            |
| Week 3-0   | MRMR              | 0.89 (0.79 - 0.95) | <b>0.67 (0.15 - 0.98)</b> | < 0.001             | < 0.001*        | 17/18                      |
|            | univariate        | 0.89 (0.79 - 0.96) | 0.48 (0.20 - 0.93)        | < 0.001             | 0.27            | 17/18                      |

Abbreviations: C-index, concordance index; MRMR, minimum redundancy - maximum relevance; univariate, univariate Cox regression; Ind., Independent

## 7 Delta-radiomics: Signatures

Table S9: **Final signature features (CT)**: Values in parenthesis denote occurrence among the top five features in percent

| Experiment         | Feature selection | Feature 1                                                                        | Feature 2                                                                                     | Feature 3                                                                                              | Feature 4                                                                                              |
|--------------------|-------------------|----------------------------------------------------------------------------------|-----------------------------------------------------------------------------------------------|--------------------------------------------------------------------------------------------------------|--------------------------------------------------------------------------------------------------------|
| Week 2-0           | MRMR univariate   | CT_2W_0W_szm_zs_entr_3d_fbs_w12_0 (29)<br>CT_2W_0W_szm_zs_entr_3d_fbs_w12_0 (35) | CT_2W_0W_dzm_zdnu_norm_3d_fbs_w12_0 (25)<br>CT_2W_0W_cm_info_corr2_d1_3d_v_mrg_fbs_w12_0 (27) | CT_2W_0W_cm_info_corr2_d1_3d_v_mrg_fbs_w12_0 (23)<br>CT_2W_0W_dzm_ldhge_3d_fbs_w12_0 (26)              | CT_2W_0W_loc_peak_loc (18)<br>CT_2W_0W_ngl_hdlge_d1_a0_0_3d_fbs_w12_0 (24)                             |
| Week 3-0           | MRMR univariate   | CT_3W_0W_morph_area_dens_aee (44)<br>CT_3W_0W_szm_lzige_3d_fbs_w12_0 (39)        | CT_3W_0W_ivh_i50 (38)<br>CT_3W_0W_ivh_i50 (30)                                                | CT_3W_0W_szm_lzige_3d_fbs_w12_0 (32)<br>CT_3W_0W_morph_area_dens_aee (28)                              | CT_3W_0W_rlm_rlnu_3d_v_mrg_fbs_w12_0 (18)<br>CT_3W_0W_rlm_rlnu_3d_v_mrg_fbs_w12_0 (21)                 |
| Week 3-2           | MRMR univariate   | CT_3W_2W_morph_area_dens_aee (45)<br>CT_3W_2W_morph_area_dens_aee (26)           | CT_3W_2W_rlm_rl_entr_3d_v_mrg_fbs_w12_0 (21)<br>CT_3W_2W_ih_p10_fbs_w12_0 (23)                | CT_3W_2W_morph_pca_least_axis (19)<br>CT_3W_2W_rlm_rl_entr_3d_v_mrg_fbs_w12_0 (22)                     | CT_3W_2W_morph_com (18)<br>CT_3W_2W_stat_kurt (21)                                                     |
| Week 2-0, 3-0      | MRMR univariate   | CT_3W_0W_morph_area_dens_aee (30)<br>CT_3W_0W_szm_lzige_3d_fbs_w12_0 (25)        | CT_3W_0W_ivh_i50 (30)<br>CT_3W_0W_ivh_i50 (25)                                                | CT_2W_0W_dzm_zdnu_norm_3d_fbs_w12_0 (17)<br>CT_2W_0W_szm_zs_entr_3d_fbs_w12_0 (19)                     | CT_2W_0W_cm_info_corr2_d1_3d_v_mrg_fbs_w12_0 (17)<br>CT_2W_0W_cm_info_corr2_d1_3d_v_mrg_fbs_w12_0 (18) |
| Week 2-0, 3-2      | MRMR univariate   | CT_3W_2W_morph_area_dens_aee (31)<br>CT_2W_0W_dzm_lde_3d_fbs_w12_0 (22)          | CT_2W_0W_dzm_zdnu_norm_3d_fbs_w12_0 (19)<br>CT_2W_0W_szm_zs_entr_3d_fbs_w12_0 (21)            | CT_2W_0W_cm_info_corr2_d1_3d_v_mrg_fbs_w12_0 (16)<br>CT_2W_0W_szm_lzige_3d_fbs_w12_0 (21)              | CT_2W_0W_szm_lzige_3d_fbs_w12_0 (13)<br>CT_2W_0W_ngl_hdlge_d1_a0_0_3d_fbs_w12_0 (20)                   |
| Week 3-0, 3-2      | MRMR univariate   | CT_3W_0W_morph_vol_dens_aee (26)<br>CT_3W_0W_szm_lzige_3d_fbs_w12_0 (26)         | CT_3W_0W_ivh_i50 (25)<br>CT_3W_0W_ivh_i50 (24)                                                | CT_3W_0W_morph_area_dens_aee (23)<br>CT_3W_0W_morph_vol_dens_aee (19)                                  | CT_3W_0W_szm_lzige_3d_fbs_w12_0 (20)<br>CT_3W_0W_morph_area_dens_aee (18)                              |
| Week 2-0, 3-0, 3-2 | MRMR univariate   | CT_3W_0W_ivh_i50 (30)<br>CT_3W_0W_ivh_i50 (25)                                   | CT_3W_0W_szm_lzige_3d_fbs_w12_0 (18)<br>CT_3W_0W_szm_lzige_3d_fbs_w12_0 (25)                  | CT_2W_0W_cm_info_corr2_d1_3d_v_mrg_fbs_w12_0 (16)<br>CT_2W_0W_cm_info_corr2_d1_3d_v_mrg_fbs_w12_0 (18) | CT_3W_0W_morph_area_dens_aee (16)<br>CT_2W_0W_dzm_zdnu_norm_3d_fbs_w12_0 (15)                          |

Table S10: **Final signature features (FDG-PET)**: Values in parenthesis denote occurrence among the top five features in percent

| Experiment | Feature selection | Feature 1                                                                              | Feature 2                                                                      | Feature 3                                                                       | Feature 4                                                                          |
|------------|-------------------|----------------------------------------------------------------------------------------|--------------------------------------------------------------------------------|---------------------------------------------------------------------------------|------------------------------------------------------------------------------------|
| Week 3-0   | MRMR univariate   | FDG_3W_0W_dzm_zdnu_norm_3d_fbs_w0_25 (51)<br>FDG_3W_0W_dzm_zdnu_norm_3d_fbs_w0_25 (50) | FDG_3W_0W_dzm_sde_3d_fbs_w0_25 (37)<br>FDG_3W_0W_dzm_zd_entr_3d_fbs_w0_25 (47) | FDG_3W_0W_ngt_strength_3d_fbs_w0_25 (33)<br>FDG_3W_0W_dzm_sde_3d_fbs_w0_25 (37) | FDG_3W_0W_ih_min_grad_g_fbs_w0_25 (28)<br>FDG_3W_0W_ngt_strength_3d_fbs_w0_25 (25) |

Table S11: **Final signature features (CT+FDG-PET):** Values in parenthesis denote occurrence among the top five features in percent

| Experiment | Feature selection  | Feature 1                                                                  | Feature 2                                                                              | Feature 3                                                        | Feature 4                                                  |
|------------|--------------------|----------------------------------------------------------------------------|----------------------------------------------------------------------------------------|------------------------------------------------------------------|------------------------------------------------------------|
| Week 3-0   | MRMR<br>univariate | FDG_3W_0W_dzm_sde_3d_fbs_w0_25 (53)<br>FDG_3W_0W_dzm_sde_3d_fbs_w0_25 (46) | FDG_3W_0W_dzm_zdnu_norm_3d_fbs_w0_25 (34)<br>FDG_3W_0W_dzm_zdnu_norm_3d_fbs_w0_25 (31) | CT_3W_0W_ivh_i50 (31)<br>FDG_3W_0W_dzm_zd_entr_3d_fbs_w0_25 (29) | CT_3W_0W_morph_area_dens_aee (21)<br>CT_3W_0W_ivh_i50 (26) |



## 8 Feature differences between cohorts

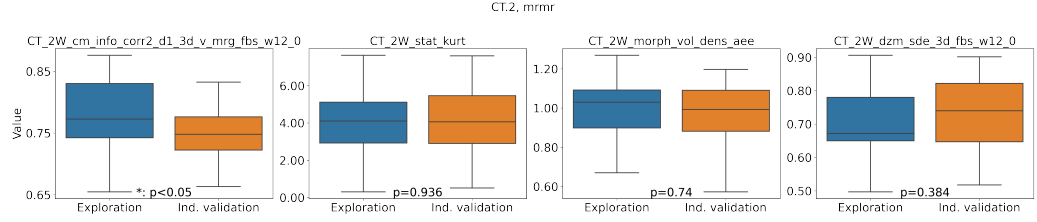

(a) CT W2 from MRMR

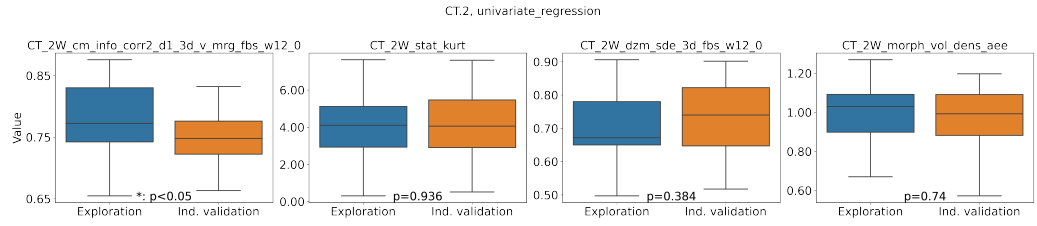

(b) CT W2 from univ.

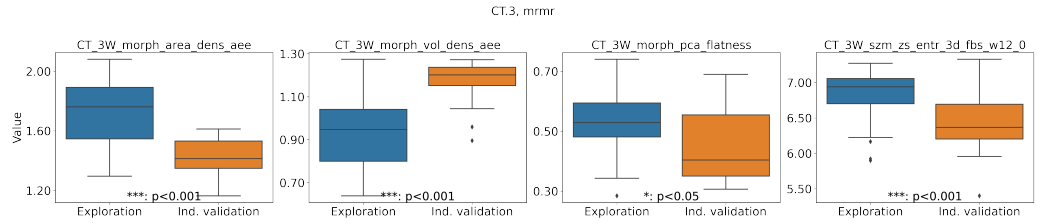

(c) CT W3 from MRMR

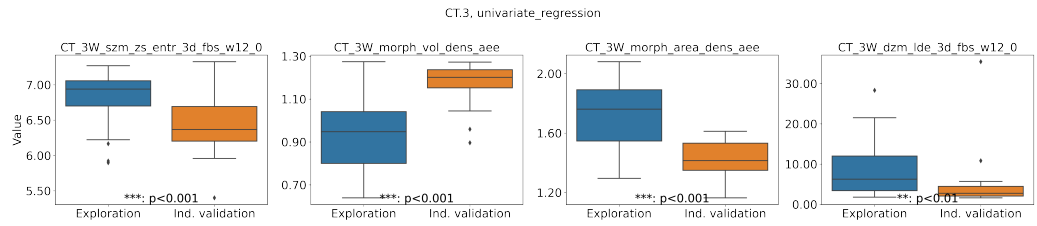

(d) CT W3 from univ.

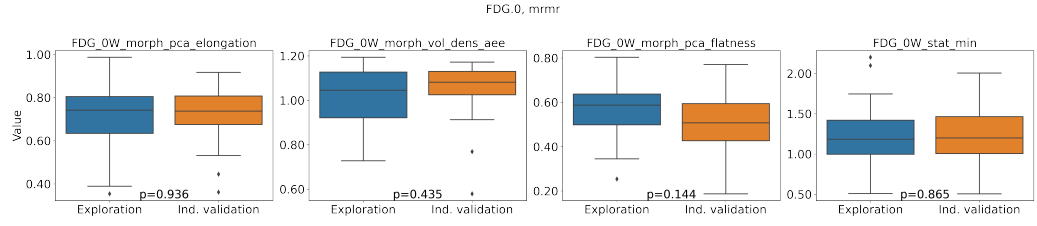

(e) FDG W0 from MRMR

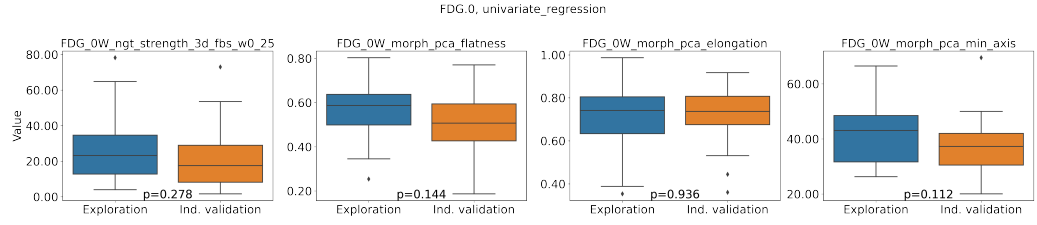

(f) FDG W0 from univ.

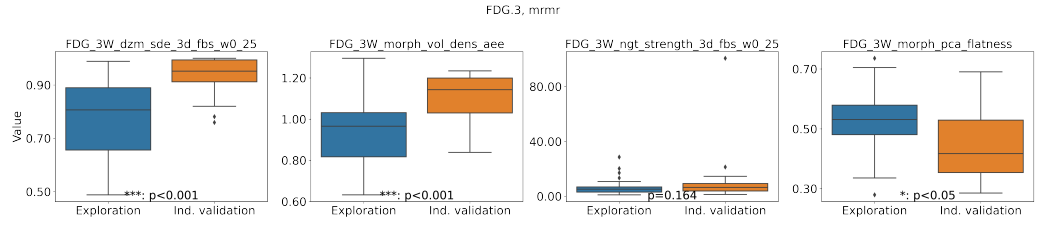

(g) FDG W3 from MRMR

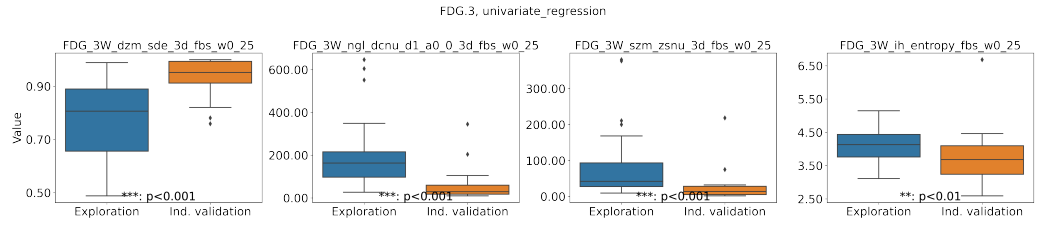

(h) FDG W3 from univ.

Figure S5: Differences between the features of the final signatures between the exploration and independent validation cohort. Testing for significant differences was performed using a Mann-Whitney U-test for which the  $p$ -values are shown. \* indicates a  $p$ -value below 0.05, \*\* below 0.01 and \*\*\* below 0.001.

## 9 Prediction differences between cohorts

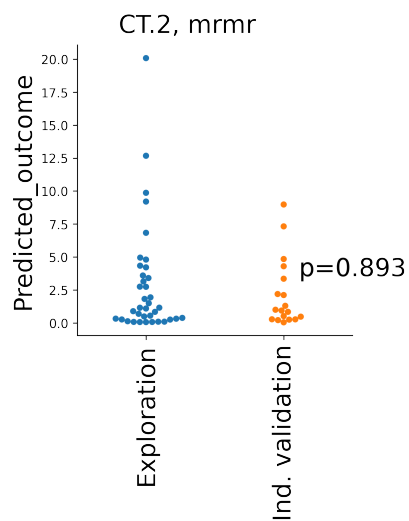

(a) CT W2 from MRMR

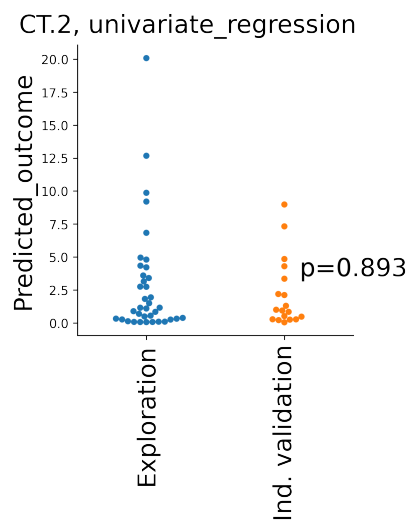

(b) CT W2 from univ.

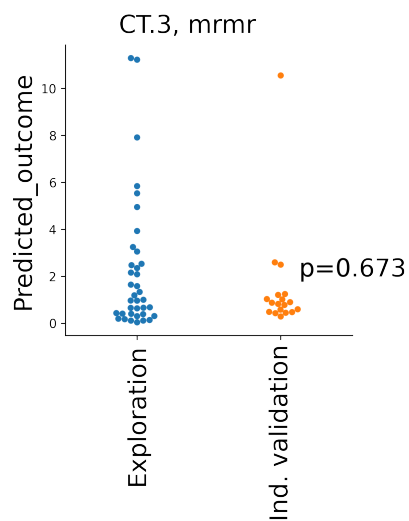

(c) CT W3 from MRMR

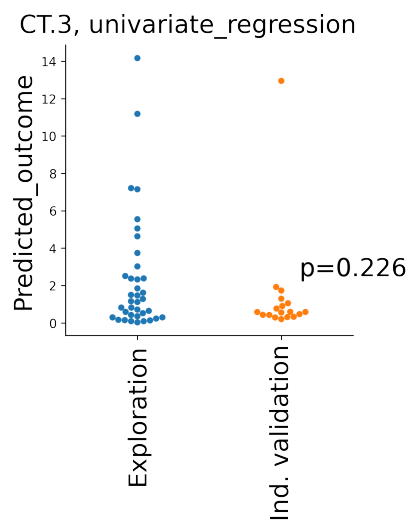

(d) CT W3 from univ.

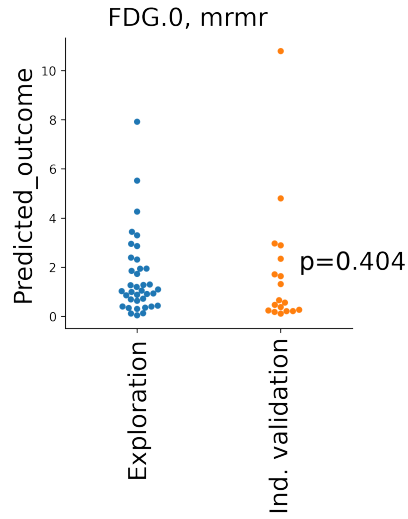

(e) FDG W0 from MRMR

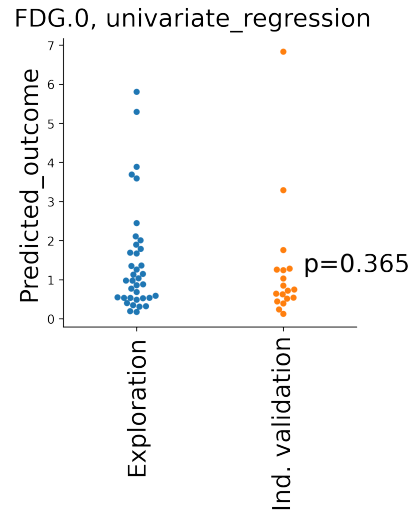

(f) FDG W0 from univ.

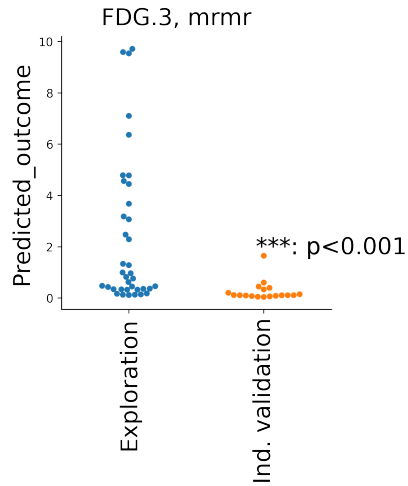

(g) FDG W3 from MRMR

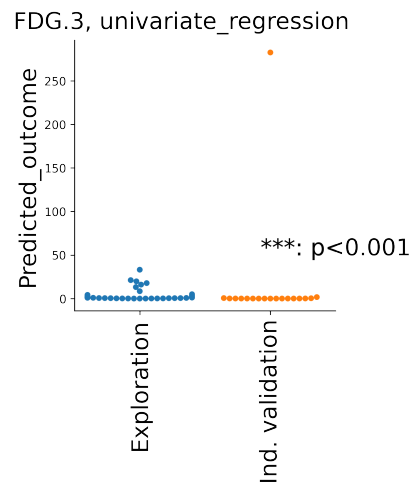

(h) FDG W3 from univ.

Figure S6: Differences between the predictions between the exploration and independent validation cohort. Testing for significant differences was performed using a Mann-Whitney U-test for which the  $p$ -values are shown. \* indicates a  $p$ -value below 0.05, \*\* below 0.01 and \*\*\* below 0.001.
